# Supplementary material
Source: PubMed Central journal article supplement (PMC7901058)

## Supplementary Data

|                                                                                                |    |
|------------------------------------------------------------------------------------------------|----|
| Figure 1. Flowchart of sampling and recruitment .....                                          | 2  |
| Table 1. A grid-type network questionnaire of nonwork-related activities .....                 | 3  |
| Figure 2. 106 locations identified from mobility data .....                                    | 4  |
| Table 2. Categorization of 106 locations into nine areas .....                                 | 5  |
| Table 3. Classification of nine visit areas .....                                              | 6  |
| Table 4. Characteristics of participants by COVID-19 exposure                                  |    |
| Table 4a Demographic variables .....                                                           | 7  |
| Table 4b. COVID-19 related variables .....                                                     | 8  |
| Table 4c. Self-efficacy and perceived susceptibility .....                                     | 9  |
| Table 4d. Mental health .....                                                                  | 10 |
| Table 5. Visit events by area and purpose                                                      |    |
| Table 5a Social gathering, grocery shopping .....                                              | 11 |
| Table 5b. Outdoor leisure, religious activities, movie .....                                   | 11 |
| Table 5c. Medical care, dating, training .....                                                 | 11 |
| Figure 3. Visit paths from dormitories to areas of destination                                 |    |
| Figure 3a. Overall visit paths .....                                                           | 12 |
| Figure 3b. Grocery shopping .....                                                              | 12 |
| Figure 3c. Remittance .....                                                                    | 13 |
| Figure 3d. Social gathering .....                                                              | 13 |
| Figure 4. Two-mode network between migrant workers and areas of visit by individual attributes |    |
| Figure 4a. Friends of migrant workers .....                                                    | 14 |
| Figure 4b. Friends of local Singaporean .....                                                  | 14 |
| Figure 4c. Have a supermarket nearby .....                                                     | 15 |
| Figure 4d. Have a friend(s) infected with COVID-19 .....                                       | 15 |
| <i>Additional</i>                                                                              |    |
| Figure 4e. Age .....                                                                           | 16 |
| Figure 4f. Years of working in Singapore .....                                                 | 16 |
| Survey Questionnaire .....                                                                     | 17 |

**Figure 1. Flowchart of sampling and recruitment**

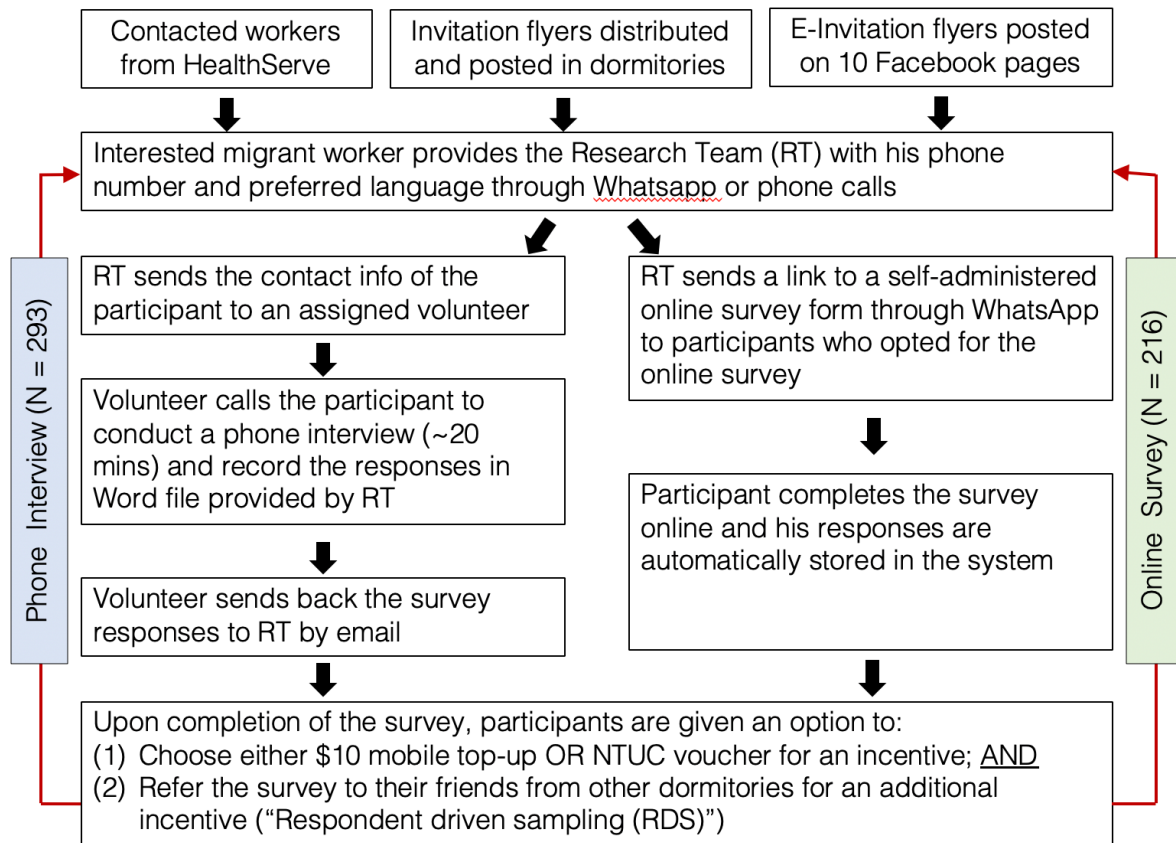

**Table 1. A grid-type network questionnaire of visits**

*On your rest day, where do you usually go? Please list the places you usually went on your rest day before the circuit break?*

| Place | Time<br>(Weekday or<br>Weekend) | Purpose | How many<br>friends do<br>you meet? | How many<br>from same<br>dormitory? | How many<br>from same<br>work? | How many<br>are local (not<br>worker?) |
|-------|---------------------------------|---------|-------------------------------------|-------------------------------------|--------------------------------|----------------------------------------|
|       |                                 |         |                                     |                                     |                                |                                        |
|       |                                 |         |                                     |                                     |                                |                                        |
|       |                                 |         |                                     |                                     |                                |                                        |
|       |                                 |         |                                     |                                     |                                |                                        |
|       |                                 |         |                                     |                                     |                                |                                        |



**Table 2. Categorization of 106 locations into nine areas**

| Area                  | Number of trips* (N=436) | Popular destinations; quoted >5 times                                                      | Description                                                                                                                                                                                    |
|-----------------------|--------------------------|--------------------------------------------------------------------------------------------|------------------------------------------------------------------------------------------------------------------------------------------------------------------------------------------------|
| 1. West               | 13 (3.0%)                | Joo Koon (5)                                                                               | Far west of Singapore. Primarily industrial area with developing residential areas and several PBDs.                                                                                           |
| 2. Southwest          | 13 (3.0%)                | Jurong East (7)<br>Boon Lay (6)                                                            | West of Singapore. Contains a mix of residential, commercial, and industrial areas. A few PBDs are located there.                                                                              |
| 3. Southcentral       | 56 (12.8%)               | Marina Bay (39)<br>Sentosa (21)                                                            | A cluster of Singapore's most famous tourist attractions, including Gardens by the Bay, Chinatown and Sentosa. Popular for sightseeing.                                                        |
| 4. Southeast          | 34 (7.8%)                | Geylang (14)<br>Geylang Mosque (6)<br>Kallang Park (6)                                     | Near the city centre; heritage area with places of worship. Some migrant workers are known to stay in the shophouses there.                                                                    |
| 5. East               | 39 (8.9%)                | Paya Lebar (9)<br>East Coast Park (6)                                                      | Contains a mix of residential, commercial, and industrial areas. East Coast Park, a popular green space, is located there. There are a few PBDs, particularly in the Changi and Tampines area. |
| 6. Northeast          | 6 (1.4%)                 | -                                                                                          | Contains a mix of residential and commercial areas. The area is still undergoing development and construction. There are a few PBDs there.                                                     |
| 7. Northcentral       | 13 (3.0%)                | Yishun (5)                                                                                 | Northern-central part of Singapore. Contains a mix of residential, commercial, and industrial areas. There are is one PBD in the area.                                                         |
| 8. Northwest          | 31 (7.1%)                | Woodlands (17)                                                                             | Contains a mix of residential, commercial, and industrial areas. A few PBDs are located there.                                                                                                 |
| 9. Migrant worker hub | 231 (53.0%)              | Mustafa (172)<br>Serangoon Road (19)<br>Little India (27)<br>Farrer Park (8)<br>Tekka (15) | Near the city centre; well-known for its places of worship and variety of shops selling South Asian goods. Telecommunication and remittance services are widely available.                     |

\*If a respondent visits multiple places in the same area, it is categorised as a single trip to facilitate network analysis. Place names provided by respondents vary in specificity, from entire districts (e.g. Geylang) to buildings (e.g. Geylang Mosque) and cannot be classified into clearly delineated subcategories. Therefore, they are not summarised in percentages.

**Table 3. Classification of nine visit areas**

We classified the destinations visited by migrant workers into nine areas. This classification was based on official district boundaries and places specific to migrant workers.

| Area                  | Description                                                                                                                                                                                    |
|-----------------------|------------------------------------------------------------------------------------------------------------------------------------------------------------------------------------------------|
| 1. West               | Far west of Singapore. Primarily industrial area with developing residential areas and several PBDs.                                                                                           |
| 2. Southwest          | West of Singapore. Contains a mix of residential, commercial, and industrial areas. A few PBDs are located there.                                                                              |
| 3. Southcentral       | A cluster of Singapore's most famous tourist attractions, including Gardens by the Bay, Chinatown and Sentosa. Popular for sightseeing.                                                        |
| 4. Southeast          | Near the city centre; heritage area with places of worship. Some migrant workers are known to stay in the shophouses there.                                                                    |
| 5. East               | Contains a mix of residential, commercial, and industrial areas. East Coast Park, a popular green space, is located there. There are a few PBDs, particularly in the Changi and Tampines area. |
| 6. Northeast          | Contains a mix of residential and commercial areas. The area is still undergoing development and construction. There are a few PBDs there.                                                     |
| 7. Northcentral       | Northern-central part of Singapore. Contains a mix of residential, commercial, and industrial areas. There are no PBDs in the area.                                                            |
| 8. Northwest          | Contains a mix of residential, commercial, and industrial areas. A few PBDs are located there.                                                                                                 |
| 9. Migrant worker hub | Near the city centre; well-known for its places of worship and variety of shops selling South Asian goods. Telecommunication and remittance services are widely available.                     |

**Table 4. Characteristics of participants by COVID-19 risk exposure: demographic variables**

|                                                | Total<br>(n=509) | Have A Friend(s) with COVID-19 |                         | Statistic<br>(t or X <sup>2</sup> ) |
|------------------------------------------------|------------------|--------------------------------|-------------------------|-------------------------------------|
|                                                |                  | Yes<br>(n=120,<br>23.6%)       | No<br>(n=389,<br>76.4%) |                                     |
|                                                |                  | Mean (sd)<br>or N (%)          | Mean (sd)<br>or N (%)   |                                     |
| Age (mean, SD)                                 |                  |                                |                         | 5.28 <sup>ns</sup>                  |
| < 20                                           | 3 (0.6%)         | 2 (1.7%)                       | 1 (0.3%)                |                                     |
| 21-30                                          | 264 (52.7%)      | 71 (61.2%)                     | 193 (50.1%)             |                                     |
| 31-40                                          | 194 (38.7%)      | 40 (34.5%)                     | 154 (40.0%)             |                                     |
| > 40                                           | 40 (8.0%)        | 3 (2.6%)                       | 37 (9.6%)               |                                     |
| Nationality                                    |                  |                                |                         | 4.73 <sup>ns</sup>                  |
| Bangladesh                                     | 476 (93.7%)      | 113 (94.2%)                    | 363 (93.3%)             |                                     |
| India                                          | 15 (3.0%)        | 1 (0.8%)                       | 14 (3.6%)               |                                     |
| China                                          | 15 (3.0%)        | 6 (5.0%)                       | 10 (2.6%)               |                                     |
| Myanmar                                        | 2 (0.4%)         | 0 (0.0%)                       | 2 (0.5%)                |                                     |
| Education                                      |                  |                                |                         | 16.59**                             |
| No school                                      | 6 (1.2%)         | 1 (0.8%)                       | 5 (1.3%)                |                                     |
| Primary                                        | 19 (3.8%)        | 1 (0.8%)                       | 18 (4.6%)               |                                     |
| Middle                                         | 59 (11.7%)       | 9 (7.6%)                       | 50 (12.9%)              |                                     |
| Secondary                                      | 231 (45.7%)      | 45 (38.1%)                     | 186 (47.9%)             |                                     |
| Post-secondary                                 | 191 (37.7%)      | 62 (52.5%)                     | 129 (33.2%)             |                                     |
| Work sectors                                   |                  |                                |                         | 4.49 <sup>ns</sup>                  |
| Construction                                   | 385 (76.2%)      | 94 (80.3%)                     | 291 (75%)               |                                     |
| Shipyards                                      | 55 (10.9%)       | 14 (12.0%)                     | 41 (10.6%)              |                                     |
| Landscaping                                    | 10 (2.0%)        | 2 (1.7%)                       | 8 (2.1%)                |                                     |
| Manufacturing                                  | 4 (0.8%)         | 1 (0.9%)                       | 3 (0.8%)                |                                     |
| Waste management                               | 2 (0.4%)         | 0 (0.0%)                       | 2 (0.5%)                |                                     |
| Maintenance                                    | 14 (2.8%)        | 2 (1.7%)                       | 12 (3.1%)               |                                     |
| Others                                         | 35 (6.9%)        | 4 (3.4%)                       | 31 (8.0%)               |                                     |
| Years lived in current dormitory/<br>residence | 1.5 (2.0)        | 2.2 (2.6)                      | 1.2 (1.8)               | 18.48***                            |
| Number of workers per room                     | 10.4 (7.2)       | 13.1 (7.0)                     | 9.6 (7.0)               | 21.82***                            |
| Number of fans per room                        | 3.5 (4.0)        | 4.6 (5.8)                      | 3.2 (3.2)               | 9.45**                              |
| Number of rooms per level/unit                 | 8.2 (13.0)       | 11.6 (20.4)                    | 7.1 (9.3)               | 9.72**                              |
| Number of showers in the level/unit            | 5.5 (7.1)        | 6.6 (7.5)                      | 5.2 (6.9)               | 5.53 <sup>ns</sup>                  |
| Number of toilets per level/unit               | 5.9 (7.2)        | 7.3 (7.4)                      | 5.5 (7.1)               | 5.05*                               |
| Supermarket in dorm/nearby                     | 384 (75.4%)      | 102 (85%)                      | 282 (72.5)              | 7.08***                             |
| Social ties: Number of friends                 |                  |                                |                         |                                     |
| Your dormitory/residence                       | 6.3 (8.4)        | 7.9 (10.8)                     | 5.8 (7.4)               | 5.23*                               |
| Other dormitory/residence                      | 4.9 (8.1)        | 6.5 (11.5)                     | 4.4 (6.6)               | 5.43*                               |
| Your work                                      | 6.5 (10.8)       | 7.6 (13.6)                     | 6.1 (9.8)               | 1.39 <sup>ns</sup>                  |
| Other works                                    | 2.4 (7.9)        | 4.1 (12.8)                     | 1.8 (5.6)               | 5.59*                               |
| Foreign domestic workers                       | 2.5 (7.9)        | 2.7 (11.2)                     | 2.8 (6.6)               | 0.15 <sup>ns</sup>                  |
| Local Singaporeans                             | 1.3 (8.2)        | 1.2 (2.5)                      | 1.5 (2.6)               | 1.12 <sup>ns</sup>                  |
| Places visited                                 |                  |                                |                         |                                     |
| Little India                                   | 231 (45.4%)      | 70 (58.8%)                     | 161 (41.3%)             | 10.62***                            |
| South                                          | 56 (11.0%)       | 16 (13.4%)                     | 40 (10.3%)              | 0.65 <sup>ns</sup>                  |

\* p < .05. \*\* p < .01. \*\*\* p < .001. ns = not significant

**Table 5. Characteristics of participants by COVID-19 risk exposure: COVID-19 related variables**

|                                         | Total<br>(n=509)<br><br>N (%) | Have A Friend(s) with COVID-19    |                                  | Statistic<br>(t or X <sup>2</sup> ) |
|-----------------------------------------|-------------------------------|-----------------------------------|----------------------------------|-------------------------------------|
|                                         |                               | Yes<br>(n=120,<br>23.6%)<br>N (%) | No<br>(n=389,<br>76.4%)<br>N (%) |                                     |
| <b>Transmission modes</b>               |                               |                                   |                                  |                                     |
| Coughing/sneezing                       | 474 (93.1%)                   | 114 (95.0%)                       | 360 (92.5%)                      | 0.52 <sup>ns</sup>                  |
| Close personal contact                  | 427 (83.9%)                   | 112 (93.3%)                       | 315 (81.0%)                      | 9.48**                              |
| Touching contaminated surfaces          | 396 (77.8%)                   | 109 (90.8%)                       | 287 (73.8%)                      | 14.47***                            |
| Touching/eating raw meat                | 271 (53.2%)                   | 81 (67.5%)                        | 190 (48.8%)                      | 12.08***                            |
| Touching/ eating contaminated food      | 309 (60.7%)                   | 88 (73.3%)                        | 221 (56.8%)                      | 9.81**                              |
| Mosquito bites                          | 171 (33.6%)                   | 48 (40.0%)                        | 123 (31.6%)                      | 2.52 <sup>ns</sup>                  |
| <b>Protection measures</b>              |                               |                                   |                                  |                                     |
| Wash hands frequently with soap         | 474 (93.1%)                   | 116 (96.7%)                       | 358 (92.0%)                      | 2.40 <sup>ns</sup>                  |
| Use hand sanitizer                      | 454 (89.2%)                   | 115 (95.8%)                       | 339 (87.1%)                      | 6.31*                               |
| Drink warm water                        | 420 (82.5%)                   | 113 (94.2%)                       | 307 (78.9%)                      | 13.74***                            |
| Wear a mask                             | 449 (88.2%)                   | 115 (95.8%)                       | 334 (85.9%)                      | 7.84**                              |
| Take vitamin C                          | 356 (69.9%)                   | 97 (80.8%)                        | 259 (66.6%)                      | 8.20**                              |
| Avoid mosquito bites                    | 256 (50.3%)                   | 70 (58.3%)                        | 186 (47.8%)                      | 3.65 <sup>ns</sup>                  |
| Avoid raw/undercooked meat              | 282 (59.2%)                   | 82 (74.5%)                        | 200 (54.6%)                      | 13.06***                            |
| Avoid crowded places                    | 418 (82.1%)                   | 106 (88.3%)                       | 312 (80.2%)                      | 3.59 <sup>ns</sup>                  |
| Actively searched for information       | 429 (84.3%)                   | 107 (89.2%)                       | 322 (82.8%)                      | 2.37 <sup>ns</sup>                  |
| Feel like I have sufficient information | 376 (73.8%)                   | 102 (85%)                         | 274 (70.4%)                      | 9.34**                              |
| <b>Sources of information</b>           |                               |                                   |                                  |                                     |
| Official government notices             | 397 (78.0%)                   | 103 (85.8%)                       | 294 (75.6%)                      | 5.04*                               |
| Local news/television                   | 265 (52.1%)                   | 72 (60.0%)                        | 193 (49.6%)                      | 3.56 <sup>ns</sup>                  |
| Home country new/television             | 263 (51.7%)                   | 68 (56.7%)                        | 195 (50.1%)                      | 1.32 <sup>ns</sup>                  |
| Social networking sites                 | 423 (83.1%)                   | 110 (91.7%)                       | 313 (80.5%)                      | 7.42**                              |
| Health professionals                    | 181 (35.6%)                   | 57 (47.5%)                        | 124 (31.9%)                      | 9.10**                              |
| Friends and co-workers                  | 306 (60.1%)                   | 84 (70%)                          | 222 (57.1%)                      | 5.87*                               |
| <b>Health Condition</b>                 |                               |                                   |                                  |                                     |
| Occupation-related                      | 154 (30.3%)                   | 30 (25.0%)                        | 124 (31.9%)                      | 1.74 <sup>ns</sup>                  |
| Headache                                | 111 (21.8%)                   | 33 (27.5%)                        | 78 (20.1%)                       | 2.56 <sup>ns</sup>                  |
| Backache                                | 107 (21.0%)                   | 29 (24.2%)                        | 78 (20.1%)                       | 0.07 <sup>ns</sup>                  |
| Skin Disease                            | 60 (11.8%)                    | 20 (16.7%)                        | 40 (10.3%)                       | 3.01 <sup>ns</sup>                  |
| Hypertension                            | 57 (11.2%)                    | 12 (12.5%)                        | 42 (10.8%)                       | 0.12 <sup>ns</sup>                  |
| Diabetes                                | 40 (7.9%)                     | 10 (8.3%)                         | 30 (7.7%)                        | 0.00 <sup>ns</sup>                  |
| Cold-like Symptoms                      | 80 (15.7%)                    | 22 (18.3%)                        | 58 (14.9%)                       | 0.57 <sup>ns</sup>                  |

\* p < .05. \*\* p < .01. \*\*\* p < .001. ns = not significant



**Table 6. Characteristics of participants by COVID-19 risk exposure: self-efficacy and perceived susceptibility**

|                                                              | Total<br>(n=509) | Have A Friend(s) with COVID-19     |                                    | Statistic<br>(t or X <sup>2</sup> ) |
|--------------------------------------------------------------|------------------|------------------------------------|------------------------------------|-------------------------------------|
|                                                              |                  | Yes<br>(n=120,<br>23.6%)           | No<br>(n=389,<br>76.4%)            |                                     |
|                                                              |                  | Mean (sd)<br>or N (%) <sup>+</sup> | Mean (sd)<br>or N (%) <sup>+</sup> |                                     |
| Confident in protecting myself                               | 2.7 (0.6)        | 2.6 (0.7)                          | 2.7 (0.5)                          | 4.16*                               |
| Not at all                                                   | 25 (5.0%)        | 10 (8.8%)                          | 15 (3.9%)                          | 4.98 <sup>ns</sup>                  |
| Little                                                       | 96 (19.3%)       | 24 (21.1%)                         | 72 (18.8%)                         |                                     |
| Very much                                                    | 377 (75.7%)      | 80 (70.2%)                         | 297 (77.3%)                        |                                     |
| Confident in preventing spread to others                     | 2.6 (0.7)        | 2.7 (0.6)                          | 2.6 (0.7)                          | 0.25 <sup>ns</sup>                  |
| Not at all                                                   | 49 (9.8%)        | 6 (5.3%)                           | 43 (11.2%)                         | 6.64 <sup>ns</sup>                  |
| Little                                                       | 83 (16.7%)       | 26 (23.0%)                         | 57 (14.8%)                         |                                     |
| Very much                                                    | 366 (73.5%)      | 81 (71.7%)                         | 285 (74%)                          |                                     |
| Worried about being infected in the past one week            | 1.9 (0.8)        | 2.1 (0.7)                          | 1.8 (0.8)                          | 8.62**                              |
| Not at all                                                   | 175 (35.4%)      | 25 (22.5%)                         | 150 (39.1%)                        | 10.40**                             |
| Little                                                       | 205 (41.4%)      | 54 (48.6%)                         | 151 (39.3%)                        |                                     |
| Very much                                                    | 115 (23.2%)      | 32 (28.8%)                         | 83 (21.6%)                         |                                     |
| Perceived likelihood of being infected in the next one month | 1.6 (0.7)        | 1.8 (0.7)                          | 1.6 (0.7)                          | 7.38**                              |
| Not at all                                                   | 263 (53.0%)      | 45 (40.2%)                         | 218 (56.8%)                        | 9.62**                              |
| Little                                                       | 158 (31.9%)      | 46 (41.1%)                         | 112 (29.2%)                        |                                     |
| Very much                                                    | 75 (15.1%)       | 21 (18.8%)                         | 54 (14.1%)                         |                                     |

Note. Perceived susceptibility and self-efficacy were assessed on three-point Likert scale (1 = not at all, 2 = somewhat, 3 = very much)

\* p < .05. \*\* p < .01. \*\*\* p < .001. ns = not significant

**Table 7. Characteristics of participants by COVID-19 risk exposure: mental health**

|                                            | Total<br>(n=509) | Have A Friend(s) with COVID-19     |                                    | Statistic<br>(t or X <sup>2</sup> ) |
|--------------------------------------------|------------------|------------------------------------|------------------------------------|-------------------------------------|
|                                            |                  | Yes<br>(n=120,<br>23.6%)           | No<br>(n=389,<br>76.4%)            |                                     |
|                                            |                  | Mean (sd)<br>or N (%) <sup>+</sup> | Mean (sd)<br>or N (%) <sup>+</sup> |                                     |
| Nervous?                                   | 1.52 (0.63)      | 1.7 (0.63)                         | 1.48 (0.62)                        | 11.22***                            |
| None                                       | 266 (54.4%)      | 44 (38.9%)                         | 222 (59.0%)                        | 14.29***                            |
| Sometimes                                  | 188 (38.4%)      | 59 (52.2%)                         | 129 (34.3%)                        |                                     |
| All the time                               | 35 (7.2%)        | 10 (8.8%)                          | 25 (6.6%)                          |                                     |
| Hopeless?                                  | 1.46 (0.58)      | 1.55 (0.6)                         | 1.44 (0.58)                        | 3.26 <sup>ns</sup>                  |
| None                                       | 271 (58.3%)      | 54 (50.5%)                         | 217 (60.6%)                        | 3.51 <sup>ns</sup>                  |
| Sometimes                                  | 173 (37.2%)      | 47 (43.9%)                         | 126 (35.2%)                        |                                     |
| All the time                               | 21 (4.5%)        | 6 (5.6%)                           | 15 (4.2%)                          |                                     |
| Restless or fidgety?                       | 1.46 (0.59)      | 1.52 (0.59)                        | 1.44 (0.59)                        | 1.66 <sup>ns</sup>                  |
| None                                       | 259 (58.9%)      | 54 (52.4%)                         | 205 (60.8%)                        | 2.44 <sup>ns</sup>                  |
| Sometimes                                  | 160 (36.4%)      | 44 (42.7%)                         | 115 (34.4%)                        |                                     |
| All the time                               | 21 (4.8%)        | 5 (4.9%)                           | 16 (4.7%)                          |                                     |
| Depressed that nothing could cheer you up? | 1.37 (0.59)      | 1.5 (0.67)                         | 1.33 (0.55)                        | 7.46**                              |
| None                                       | 295 (68.4%)      | 61 (59.2%)                         | 234 (71.3%)                        | 7.76*                               |
| Sometimes                                  | 113 (26.2%)      | 32 (31.1%)                         | 81 (24.7%)                         |                                     |
| All the time                               | 23 (5.3%)        | 10 (9.7%)                          | 13 (4.0%)                          |                                     |
| That everything was an effort?             | 1.41 (0.63)      | 1.48 (0.65)                        | 1.38 (0.62)                        | 1.92 <sup>ns</sup>                  |
| None                                       | 290 (67.0%)      | 63 (60.6%)                         | 227 (69.0%)                        | 2.58 <sup>ns</sup>                  |
| Sometimes                                  | 110 (25.4%)      | 32 (30.8%)                         | 78 (23.7%)                         |                                     |
| All the time                               | 33 (7.6%)        | 9 (8.7%)                           | 24 (7.3%)                          |                                     |
| Worthless?                                 | 1.27 (0.53)      | 1.31 (0.58)                        | 1.26 (0.52)                        | 0.64 <sup>ns</sup>                  |
| None                                       | 328 (76.6%)      | 77 (74.8%)                         | 251 (77.5%)                        | 0.92 <sup>ns</sup>                  |
| Sometimes                                  | 82 (19.2%)       | 20 (19.4%)                         | 61 (18.8%)                         |                                     |
| All the time                               | 18 (4.2%)        | 6 (5.8%)                           | 12 (3.7%)                          |                                     |

Note. Mental health was assessed on three-point Likert scale (1 = not at all, 2 = somewhat, 3 = very much)

\* p < .05. \*\* p < .01. \*\*\* p < .001. ns = not significant

**Table 8. Visit events by area and purpose**

Table 8.1. Social gathering, grocery shopping

|                    | Social Gathering | Grocery Shopping | Remittance |
|--------------------|------------------|------------------|------------|
| Migrant worker hub | 34.5%            | 47.1%            | 49.8%      |
| Southeast          | 35.0%            | 27.5%            | 7.5%       |
| West               | 53.8%            | 15.4%            | 38.5%      |
| Southwest          | 61.5%            | 23.1%            | 7.7%       |
| Southcentral       | 76.6%            | 5.2%             | 5.2%       |
| East               | 34.8%            | 30.4%            | 21.7%      |
| Northwest          | 22.6%            | 29.0%            | 45.2%      |
| Northcentral       | 46.2%            | 46.2%            | 15.4%      |
| Northeast          | 28.6%            | 28.6%            | 28.6%      |

Table 8.2. Outdoor leisure, religious activities, movie

|                    | Outdoor leisure | Religious Activities | Movie |
|--------------------|-----------------|----------------------|-------|
| Migrant worker hub | 4.2%            | 9.6%                 | 1.9%  |
| Southeast          | 20.0%           | 17.5%                | -     |
| West               | 7.7%            | 7.7%                 | -     |
| Southwest          | 15.4%           | -                    | -     |
| Southcentral       | 23.4%           | 5.2%                 | -     |
| East               | 15.2%           | 2.2%                 | 4.3%  |
| Northwest          | 9.7%            | 3.2%                 | 6.5%  |
| Northcentral       | 23.1%           | 15.4%                | -     |
| Northeast          | 28.6%           | -                    | -     |

Table 8.3. Medical care, dating, training

|                    | Medical Care | Dating | Training |
|--------------------|--------------|--------|----------|
| Migrant worker hub | 0.4%         | 0.8%   | -        |
| Southeast          | 5.0%         | -      | -        |
| West               | -            | -      | 7.7%     |
| Southwest          | -            | -      | -        |
| Southcentral       | 3.9%         | 5.2%   | -        |
| East               | -            | 2.2%   | -        |
| Northwest          | -            | -      | 3.2%     |
| Northcentral       | -            | -      | -        |
| Northeast          | 14.3%        | -      | -        |

**Figure 3. Visit paths from dormitories to areas of destination**

**Figure 3.1. Overall visit paths**

(a) Overall mobility paths

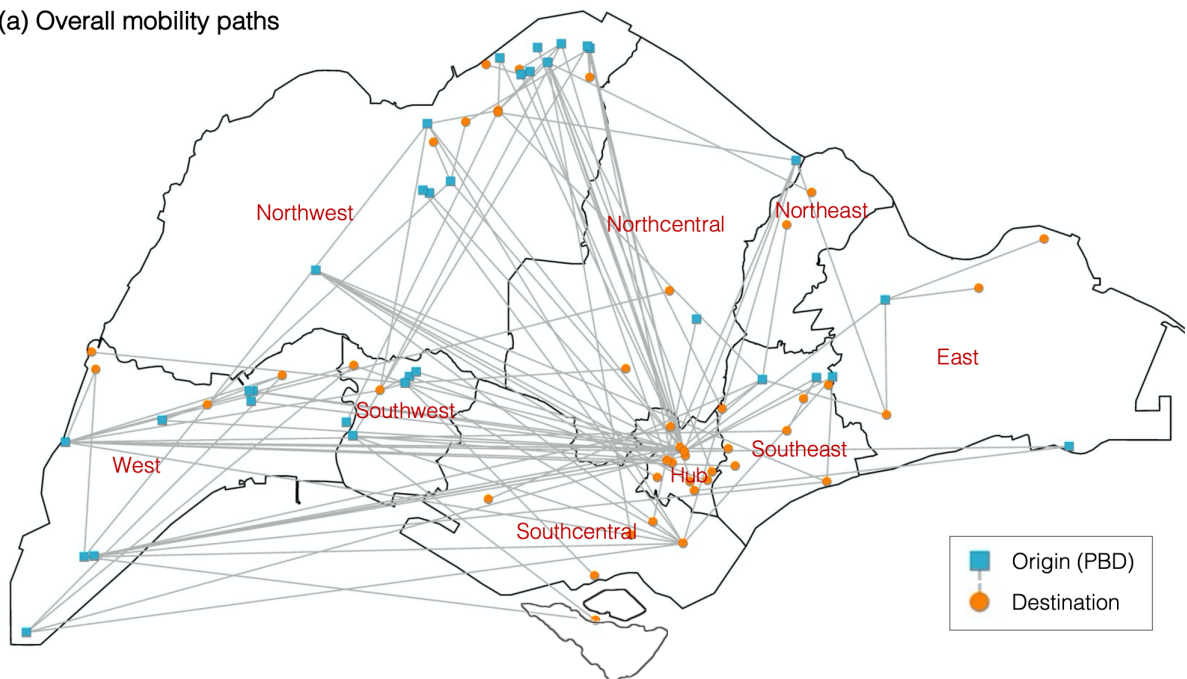

**Figure 3.2. Grocery shopping**

(b) Grocery shopping

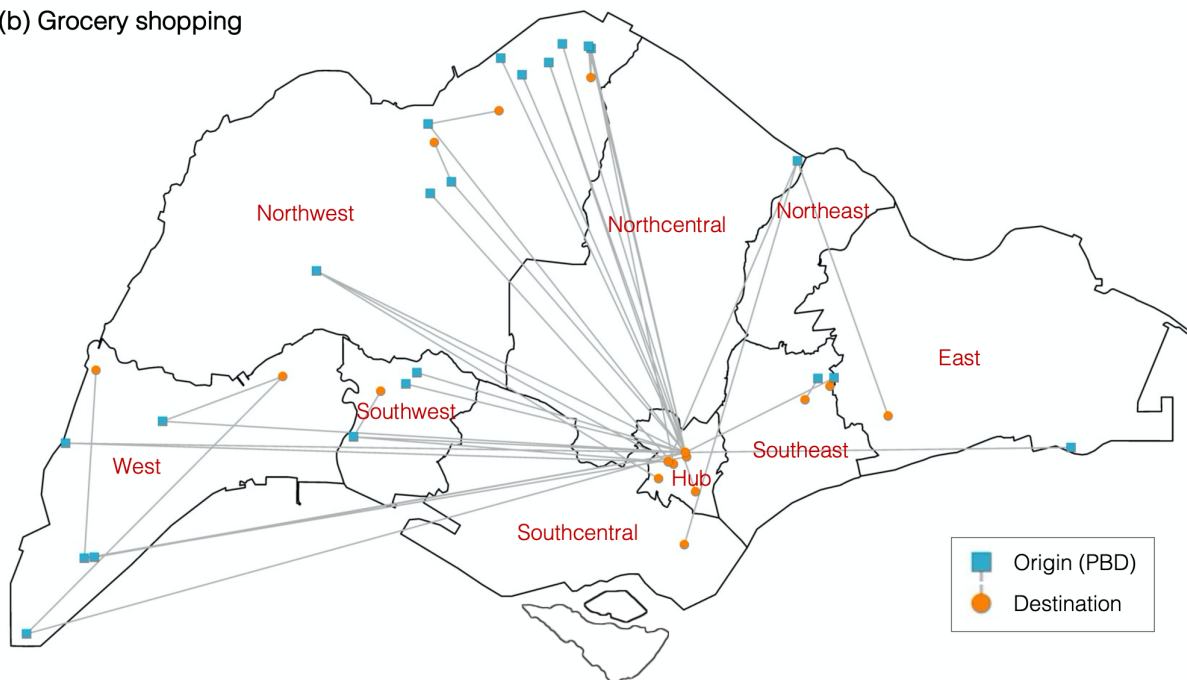

**Figure 3.3. Remittance**

(c) Remittance

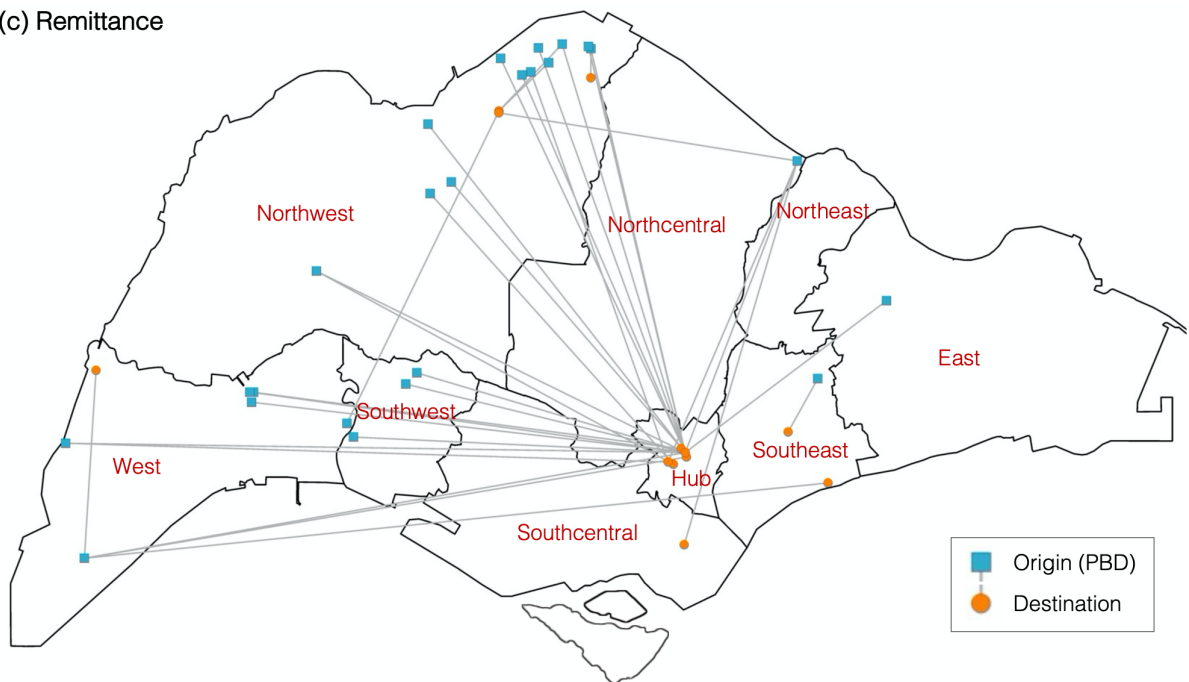

**Figure 3.4. Social gathering**

(d) Social gathering

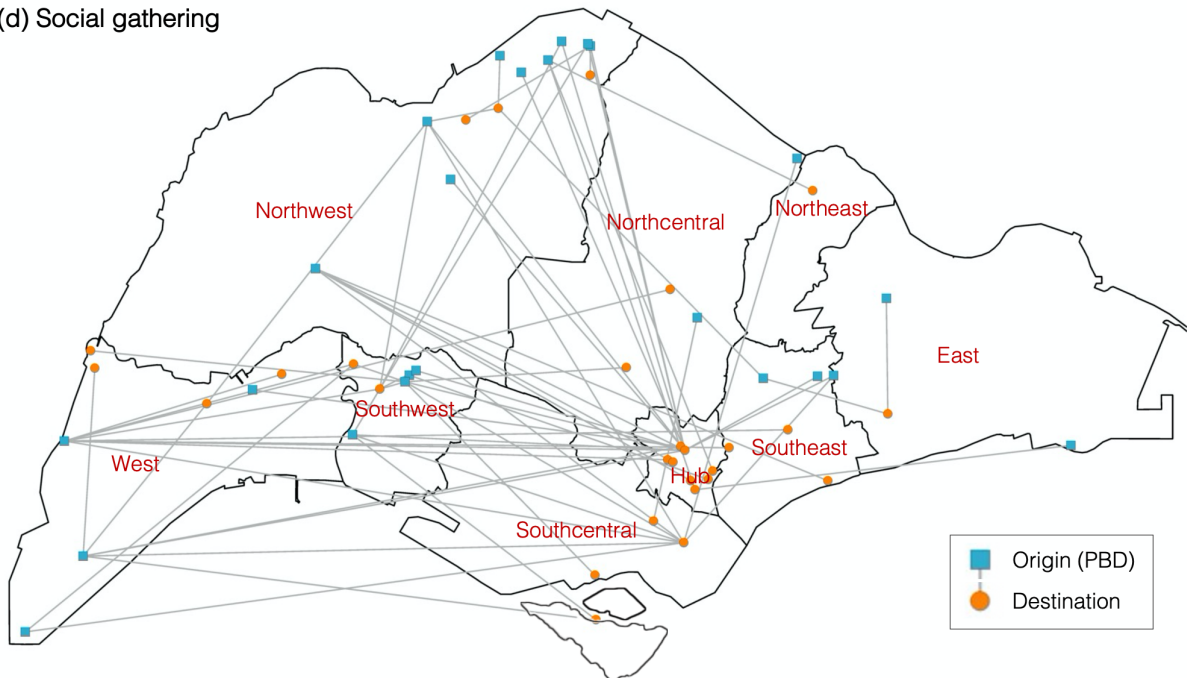

Figure 4. Two-mode network between migrant workers and areas of visit by individual attributes

Figure 4.1. Friends of migrant workers

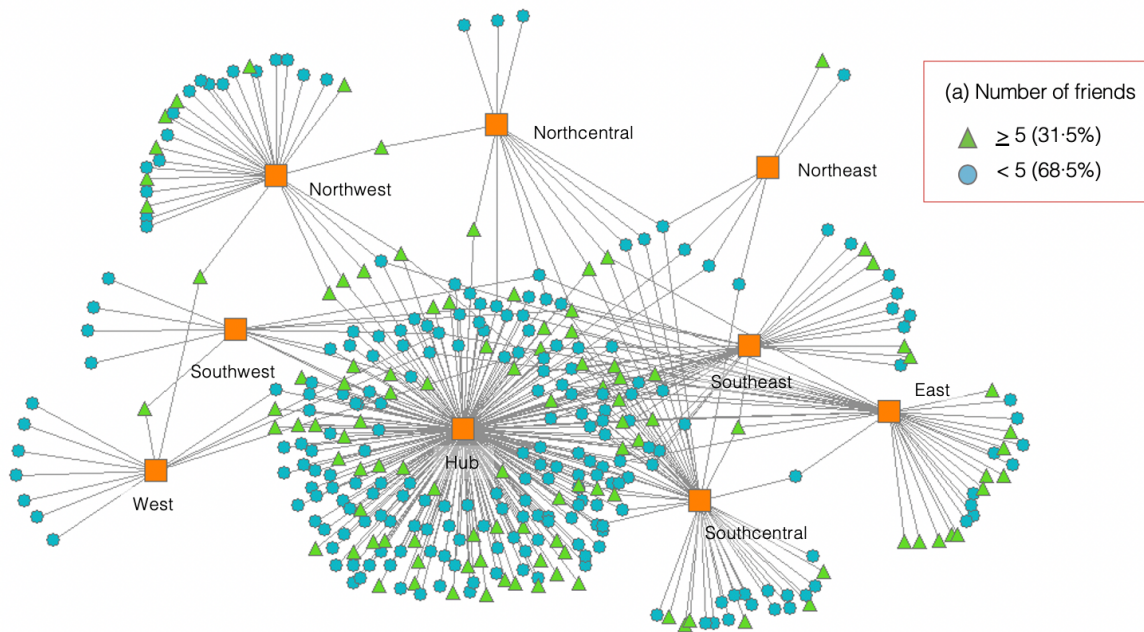

Figure 4.2. Friends of local Singaporean

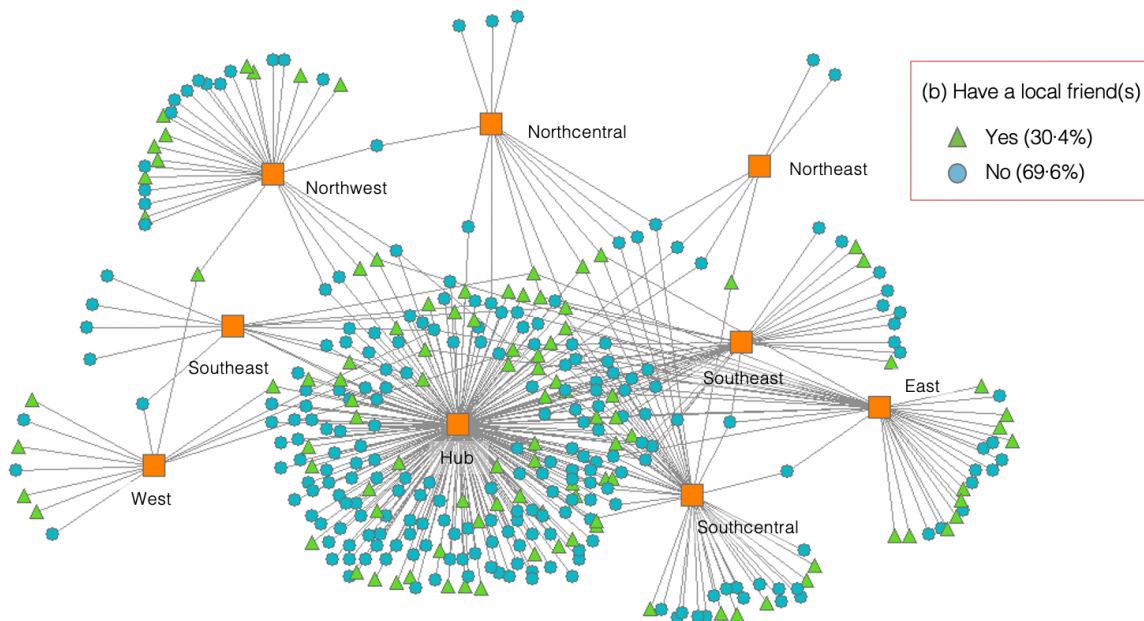

Figure 5 (b): Social ties with local Singaporeans

Figure 4.3. Have a supermarket nearby

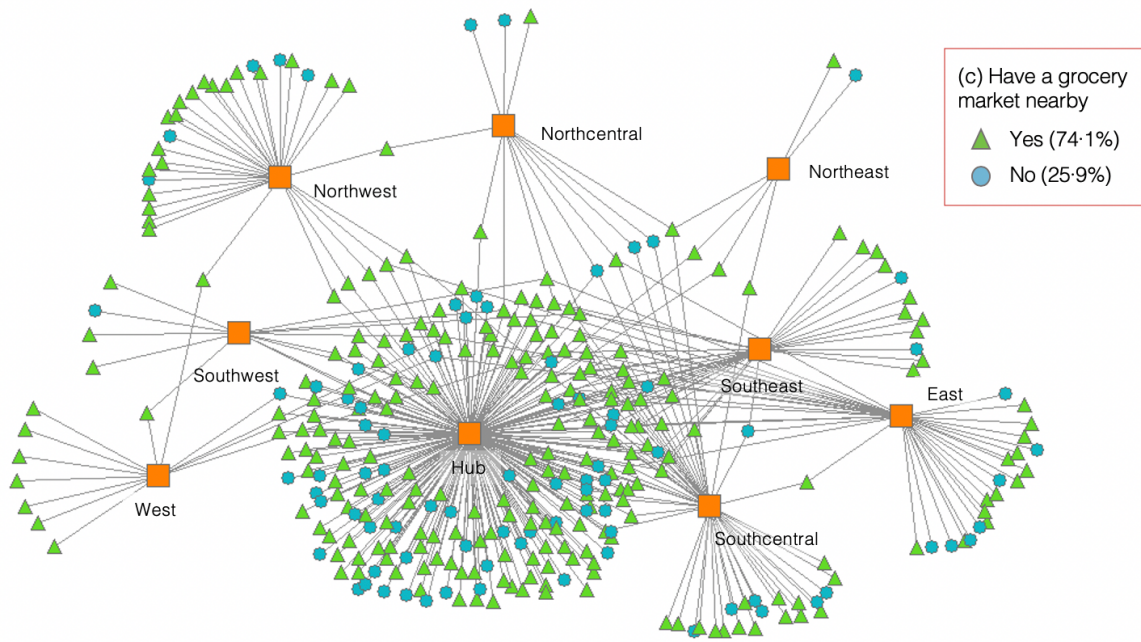

Figure 4.4. Have a friend(s) infected with COVID-19

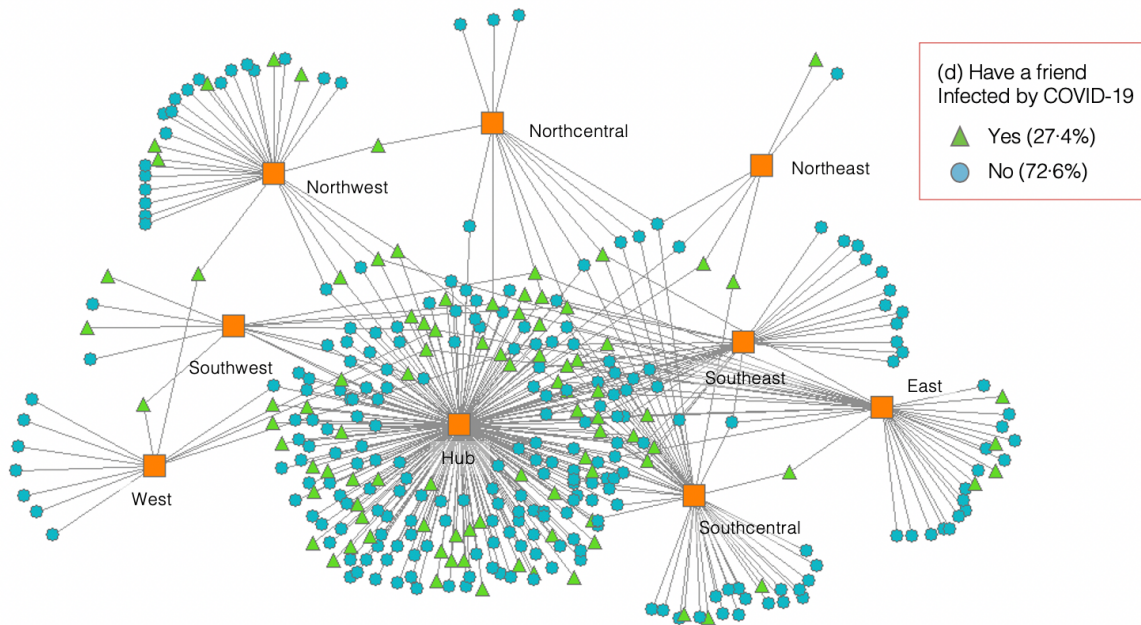

Additional

Figure 4.5. Age

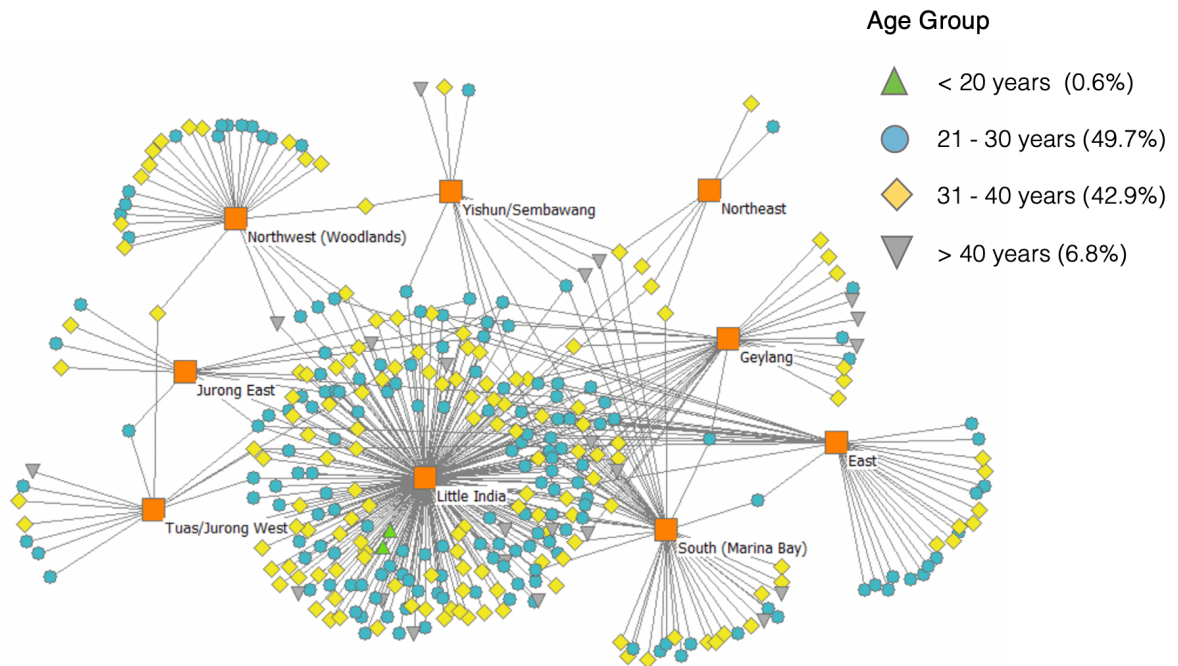

Figure 4.6. Years of working in Singapore

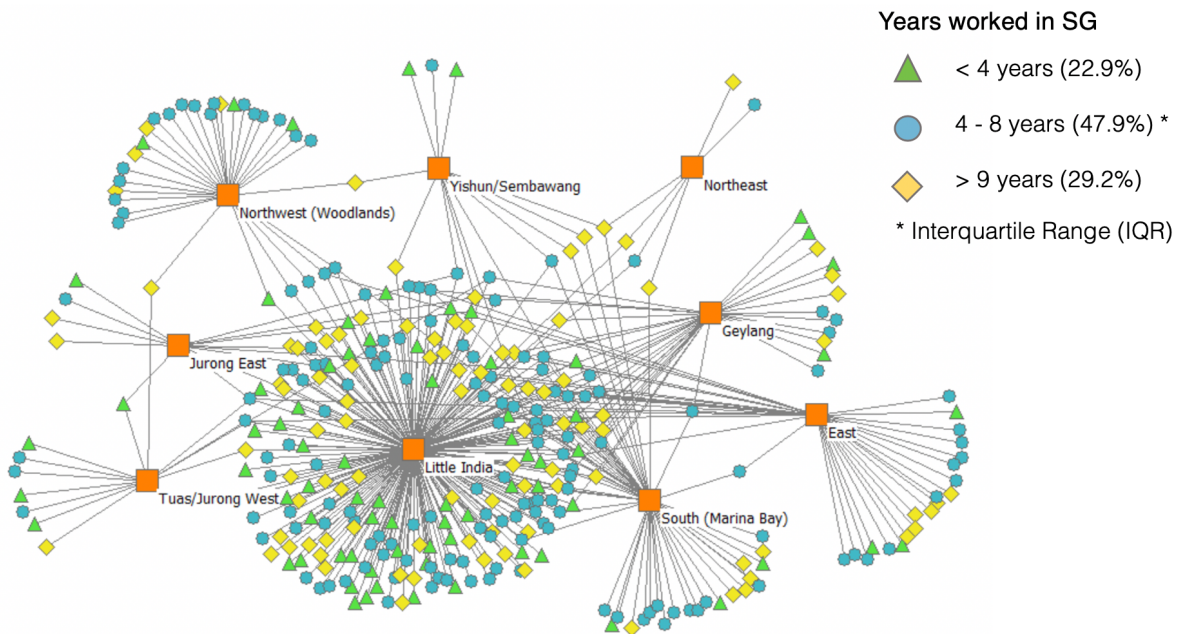

Supplement: jtm-20-056_r2_supplementary_data_taaa159.pdf [file jtm-20-056_r2_supplementary_data_taaa159.pdf]
